# Supplementary material
Source: PubMed Central journal article supplement (PMC9928905)
Supplement: NIHMS1841772-supplement-Table_S1.pdf [file NIHMS1841772-supplement-Table_S1.pdf]

**Table S1: Quality appraisal of the included studies using the Critical Appraisal Screening**

**Program (CASP,2020)**

| Study                                                                                                       | 1  | 2  | 3  | 4  | 5  | 6  | 7  | 8  | 9  | 10 | 11 | 12 | 13 | 14 | 15 | 16 | 17 | 18 | 19 | 20 | 21 | 22 | 23 |    |
|-------------------------------------------------------------------------------------------------------------|----|----|----|----|----|----|----|----|----|----|----|----|----|----|----|----|----|----|----|----|----|----|----|----|
| Did the study address a clearly focused issue?                                                              | Y  | Y  | Y  | Y  | Y  | Y  | Y  | Y  | Y  | Y  | Y  | Y  | Y  | Y  | Y  | Y  | Y  | Y  | Y  | Y  | Y  | Y  | Y  | Y  |
| Did the authors use an appropriate method to answer their question?                                         | Y  | Y  | Y  | Y  | Y  | Y  | Y  | Y  | Y  | Y  | Y  | Y  | Y  | Y  | Y  | Y  | Y  | Y  | Y  | Y  | Y  | Y  | Y  | Y  |
| Were the subjects recruited in an acceptable way?                                                           | Y  | Y  | Y  | Y  | Y  | Y  | Y  | Y  | Y  | Y  | Y  | Y  | Y  | Y  | Y  | Y  | Y  | Y  | Y  | Y  | Y  | Y  | Y  | Y  |
| Were the controls selected in an acceptable way?                                                            | CT | CT | Y  | CT | Y  | CT | CT | CT | Y  | CT | CT | CT | CT | CT | CT | Y  | Y  | CT |
| Was the exposure accurately measured to minimize bias?                                                      | Y  | Y  | Y  | Y  | Y  | Y  | Y  | Y  | Y  | Y  | Y  | Y  | Y  | Y  | Y  | Y  | Y  | Y  | Y  | Y  | Y  | Y  | Y  | Y  |
| Aside from the experimental intervention, were the groups treated equally?                                  | Y  | Y  | Y  | Y  | Y  | Y  | Y  | Y  | Y  | Y  | Y  | Y  | Y  | Y  | Y  | Y  | Y  | Y  | Y  | Y  | Y  | Y  | Y  | Y  |
| Have the authors taken account of the potential confounding factors in the design and/or in their analysis? | Y  | Y  | Y  | Y  | Y  | Y  | Y  | Y  | Y  | Y  | Y  | Y  | Y  | Y  | Y  | Y  | Y  | Y  | Y  | Y  | Y  | Y  | Y  | Y  |
| How large was the treatment effect?                                                                         | NA |
| How precise was the estimate of the treatment effect?                                                       | NA |
| Do you believe the results?                                                                                 | Y  | Y  | Y  | Y  | Y  | Y  | Y  | Y  | Y  | Y  | Y  | Y  | Y  | Y  | Y  | Y  | Y  | Y  | Y  | Y  | Y  | Y  | Y  | Y  |
| Can the results be applied to the local population?                                                         | CT | CT | Y  | Y  | Y  | CT | Y  | Y  | Y  | CT | Y  | Y  | CT | CT | Y  | Y  | CT |
| Do the results of this study fit with other available evidence?                                             | Y  | Y  | Y  | N  | Y  | Y  | N  | Y  | Y  | Y  | Y  | Y  | Y  | Y  | Y  | Y  | Y  | Y  | Y  | N  | Y  | Y  | Y  | Y  |

Note. Abbreviation: Y=yes; N=no; CT=can't tell
