# Supplementary material
Source: PubMed Central journal article supplement (PMC9928905)

**Figure S1:** Preferred reporting items for systematic reviews PRISMA flow diagram

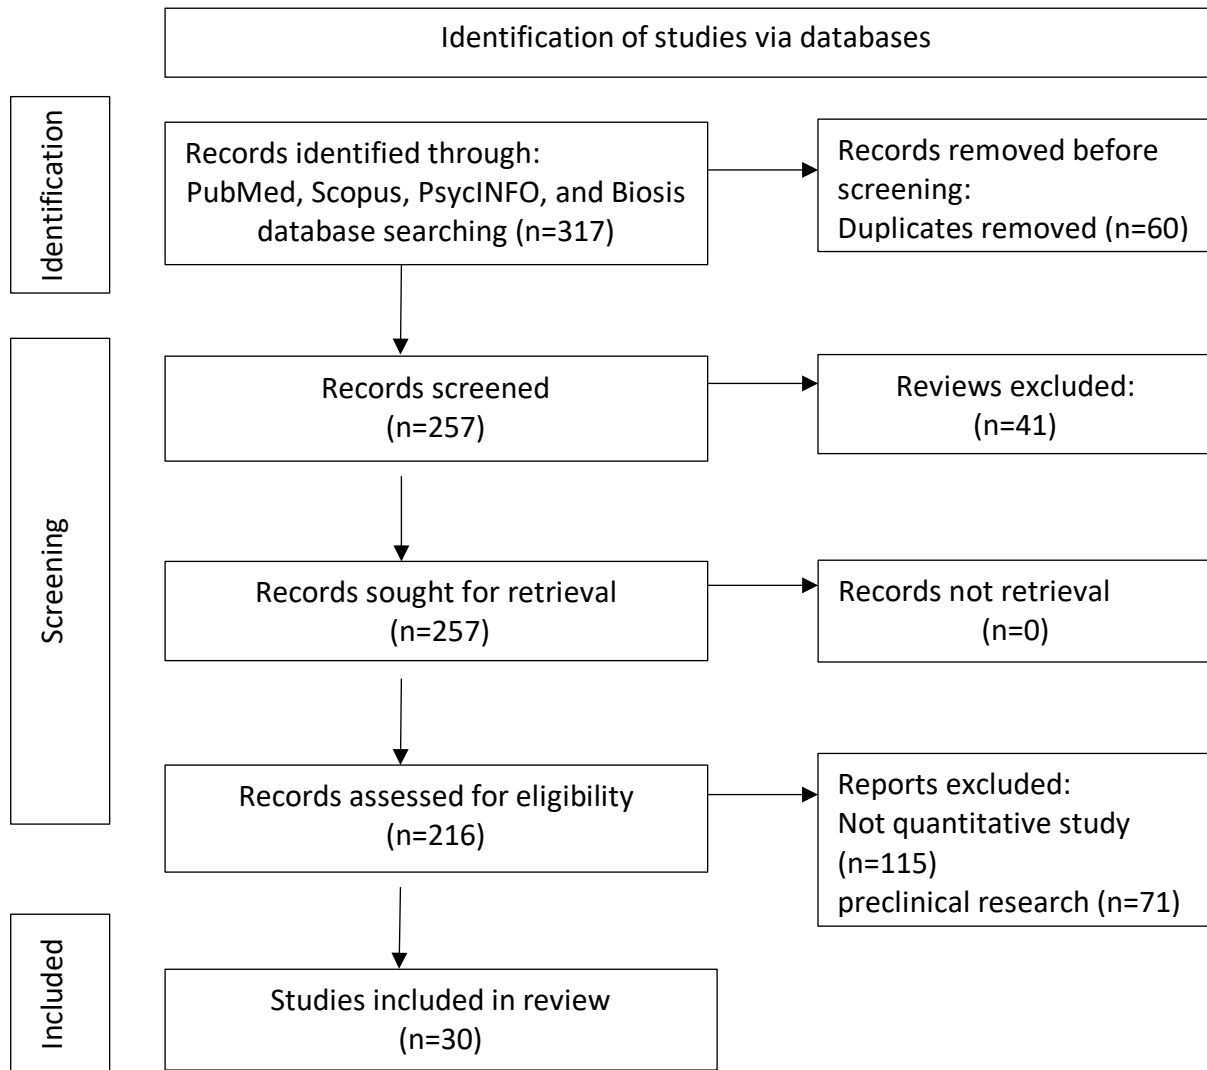

Supplement: NIHMS1841772-supplement-Figure_S1.pdf [file NIHMS1841772-supplement-Figure_S1.pdf]
